# Supplementary material for: GC Insights: The crystal structures behind mineral properties – a case study of using TotBlocks in an undergraduate optical mineralogy lab
Source: Copernicus journal article supplement (doi:10.5194/gc-6-125-2023), 2023-10-05
Supplement: Supplementary file 2 [file gc-6-125-2023-supplement.zip]

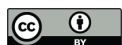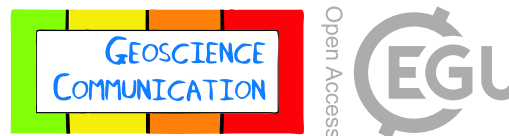

## *Supplement of*

# **GC Insights: The crystal structures behind mineral properties – a case study of using TotBlocks in an undergraduate optical mineralogy lab**

**Derek D. V. Leung and Paige E. dePolo**

*Correspondence to:* Derek D. V. Leung (dleung@laurentian.ca)

- gc-6-125-2023-supplement-title-page.pdf
- FileS1\_totblocks-lab-activity-2022-03-29.pdf
- FileS2\_totblocks-questionnaire-2022-03-29.pdf
- FileS3\_questionnaire-results.xlsx
- FileS4\_totblocks-updated-lab-2023-06-27\_2.pdf

The copyright of individual parts of the supplement might differ from the article licence.
