# Supplementary material for: GC Insights: The crystal structures behind mineral properties – a case study of using TotBlocks in an undergraduate optical mineralogy lab
Source: Copernicus journal article supplement (doi:10.5194/gc-6-125-2023), 2023-10-05
Supplement: Supplementary file 4 [file gc-6-125-2023-supplement.zip]

Archive with 5 entries (5 files):
- gc-6-125-2023-supplement-title-page.pdf
- FileS2_totblocks-questionnaire-2022-03-29.pdf
- FileS4_totblocks-updated-lab-2023-06-27_2.pdf
- FileS1_totblocks-lab-activity-2022-03-29.pdf
- FileS3_questionnaire-results.xlsx
